# Supplementary material for: BAP1 regulates epigenetic switch from pluripotency to differentiation in developmental lineages giving rise to BAP1-mutant cancers
Source: PubMed Central journal article supplement — Sci Adv. 2019 Sep 18;5(9):eaax1738. doi: 10.1126/sciadv.aax1738 (PMC6750916; doi:10.1126/sciadv.aax1738), 2019-09-18
Supplement: aax1738_SM.pdf [file aax1738_SM.pdf]

## Supplementary Materials for

### **BAP1 regulates epigenetic switch from pluripotency to differentiation in developmental lineages giving rise to BAP1-mutant cancers**

Jeffim N. Kuznetsov, Tristan H. Aguero, Dawn A. Owens, Stefan Kurtenbach, Matthew G. Field, Michael A. Durante, Daniel A. Rodriguez, Mary Lou King, J. William Harbour\*

\*Corresponding author. Email: harbour@miami.edu

Published 18 September 2019, *Sci. Adv.* **5**, eaax1738 (2019)  
DOI: 10.1126/sciadv.aax1738

#### **The PDF file includes:**

- Fig. S1. *X. laevis* and human Bap1 proteins show extensive sequence homology.
  - Fig. S2. Anatomic distribution of *Xenopus* bap1 mRNA and Bap1 protein expression during early development.
  - Fig. S3. Bap1 morpholinos and expression constructs.
  - Fig. S4. Developmental abnormalities in Bap1-deficient embryos are rescued by exogenous human BAP1.
  - Fig. S5. Loss of Asxl1 phenocopy loss of Bap1 during *Xenopus* development.
  - Fig. S6. Pharmacologic rescue of Bap1-deficient phenotype.
  - Fig. S7. Hdac4 is a key mediator of Bap1-deficient phenotype and acts independently of Hdac3 during development.
  - Fig. S8. Inhibition of HDAC4 significantly impairs proliferation of uveal melanoma cells in a BAP1-dependent manner.
- Legends for data files S1 and S2

#### **Other Supplementary Material for this manuscript includes the following:**

(available at [advances.sciencemag.org/cgi/content/full/5/9/eaax1738/DC1](https://advances.sciencemag.org/cgi/content/full/5/9/eaax1738/DC1))

- Data file S1 (Microsoft Excel format). Oligonucleotides and plasmids used in this study.
- Data file S2 (Microsoft Excel format). Proteomic, transcriptomic, and epigenomic analyses.

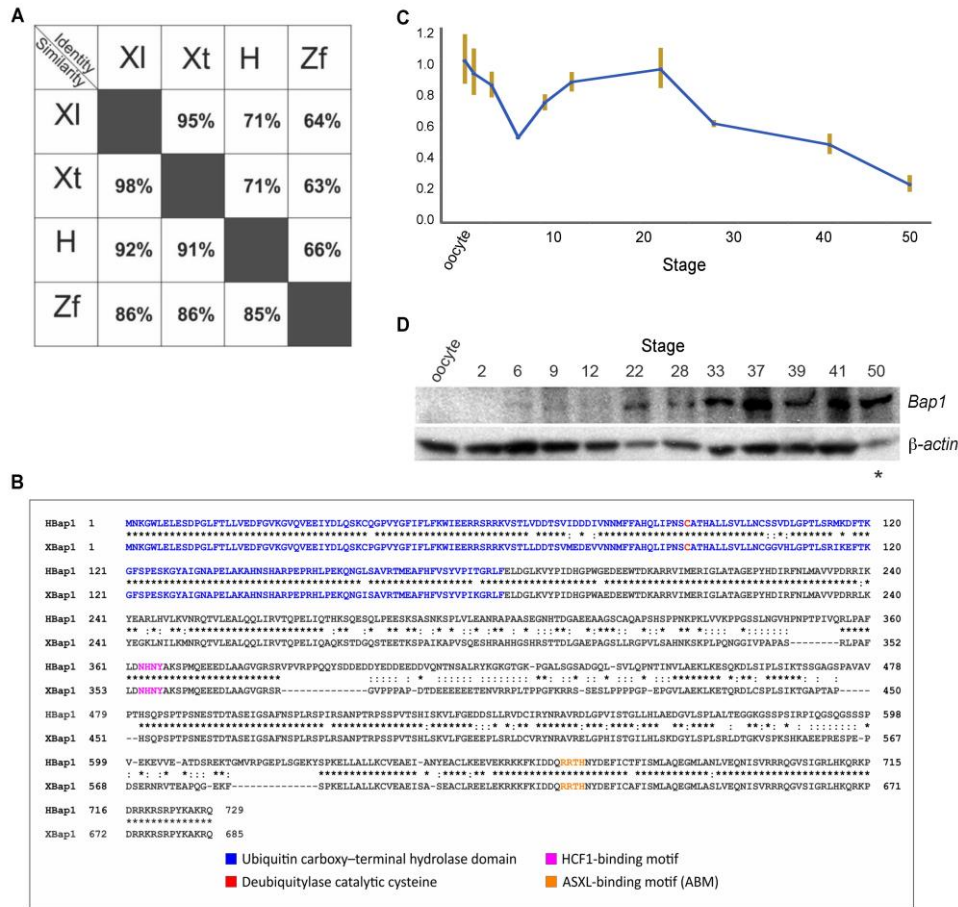

**Fig. S1. *X. laevis* and human Bap1 proteins show extensive sequence homology. (A)** Similarity and identity comparisons between *Xenopus laevis* (Xl), *Xenopus tropicalis* (Xt), human (H), and zebrafish (Zf) Bap1 proteins. **(B)** Sequence alignment of human and *Xenopus laevis* Bap1 proteins. **(C)** Expression of *bap1* mRNA by RT-qPCR at the indicated stages during *Xenopus laevis* early development (vertical yellow bars indicate standard error). **(D)** Detection of Bap1 protein by western blot at the indicated stages during *Xenopus laevis* early development. A total of 50  $\mu$ g of protein was loaded into each lane, except for stage 50, in which 20  $\mu$ g of protein lysate was used (\*).

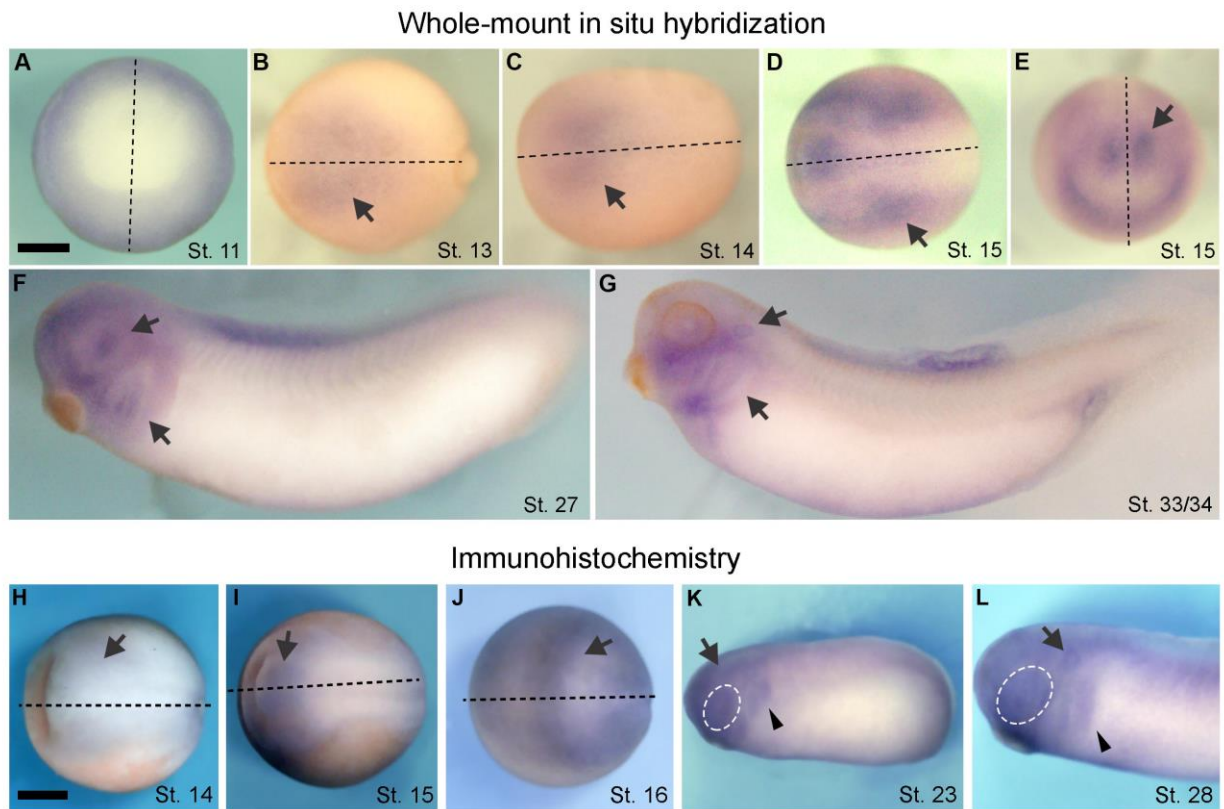

**Fig. S2. Anatomic distribution of *Xenopus bap1* mRNA and Bap1 protein expression during early development.** (A) By whole-mount in situ hybridization, *bap1* mRNA (blue color) is located diffusely in early mesoderm and ectoderm at gastrulation. (B-C) *bap1* mRNA (arrows) becomes restricted to the early developing neural plate at stages 13-14. (D-E) *Bap1* mRNA (arrows) is circumscribed at the lateral and anterior neural plate borders, including prospective neural crest, non-neural ectoderm, mid-brain, and sensorial placode, at stage 15. (F) During early tailbud stages, *bap1* mRNA is located in migrating cranial neural crest cells and optic vesicle (arrows). (G) In late tailbud stage, *bap1* mRNA is localized to branchial arches and otic vesicle (arrows). Panels show posterior view, dorsal at top (A), dorsal view, anterior side left (B-D), anterior at bottom, dorsal side up (E), and lateral view, anterior left (F,G). Dotted lines indicate midline; note symmetry of *bap1* expression. (H-J) By immunohistochemistry, Bap1 protein (arrows) is detected at the neural plate border during neurulation stages. (K) During early tailbud stages, Bap1 protein is localized to the eye field (dashed white oval), migrating cranial neural crest (arrowhead), and brain (arrow). (L) During later tailbud stages, Bap1 protein is mostly localized to eye field (dashed white oval), brachial arches (arrowhead), and otic vesicle (arrow). Panels show dorsal view, anterior side left (A-C), and lateral view, anterior side left (K,L). Dotted lines indicate midline. Scale bar: 250  $\mu$ m.

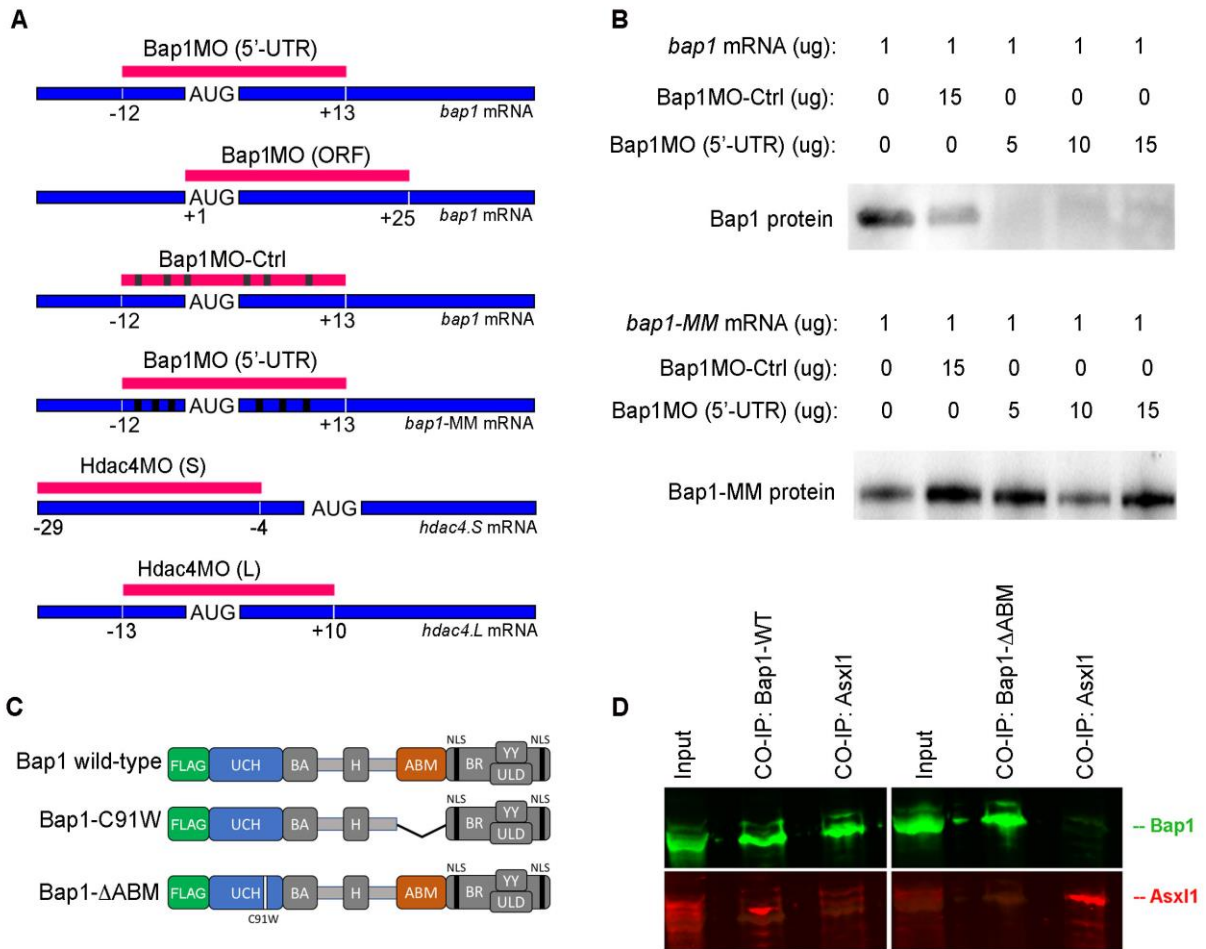

**Fig. S3. Bap1 morpholinos and expression constructs.** (A) Schematic representations of Bap1, Hdac3, Hdac4, and control morpholinos (red bars) and their binding sites within their targeted mRNAs (blue bars). Base-pair mismatches are indicated in black. (B) Validation of morpholino efficiency using *in vitro* wheat germ extracts for protein translation after incubating *bap1* mRNA with either control or increasing amounts of Bap1 morpholino (5'-UTR). (C) Schematic representations of recombinant proteins. Bap1 $\Delta$ ABM includes a deletion within the Asx1 binding motif (ABM). Bap1-C91W contains a point mutation in the ubiquitin hydrolase catalytic cysteine. (D) Co-immunoprecipitation followed by western blot validating that the Bap1 $\Delta$ ABM mutant protein does not bind efficiently to Asx11. Anti-FLAG (for Bap1) and Anti-V5 (for Asx11) antibodies were used to detect Bap1 and Asx11, respectively, as indicated.



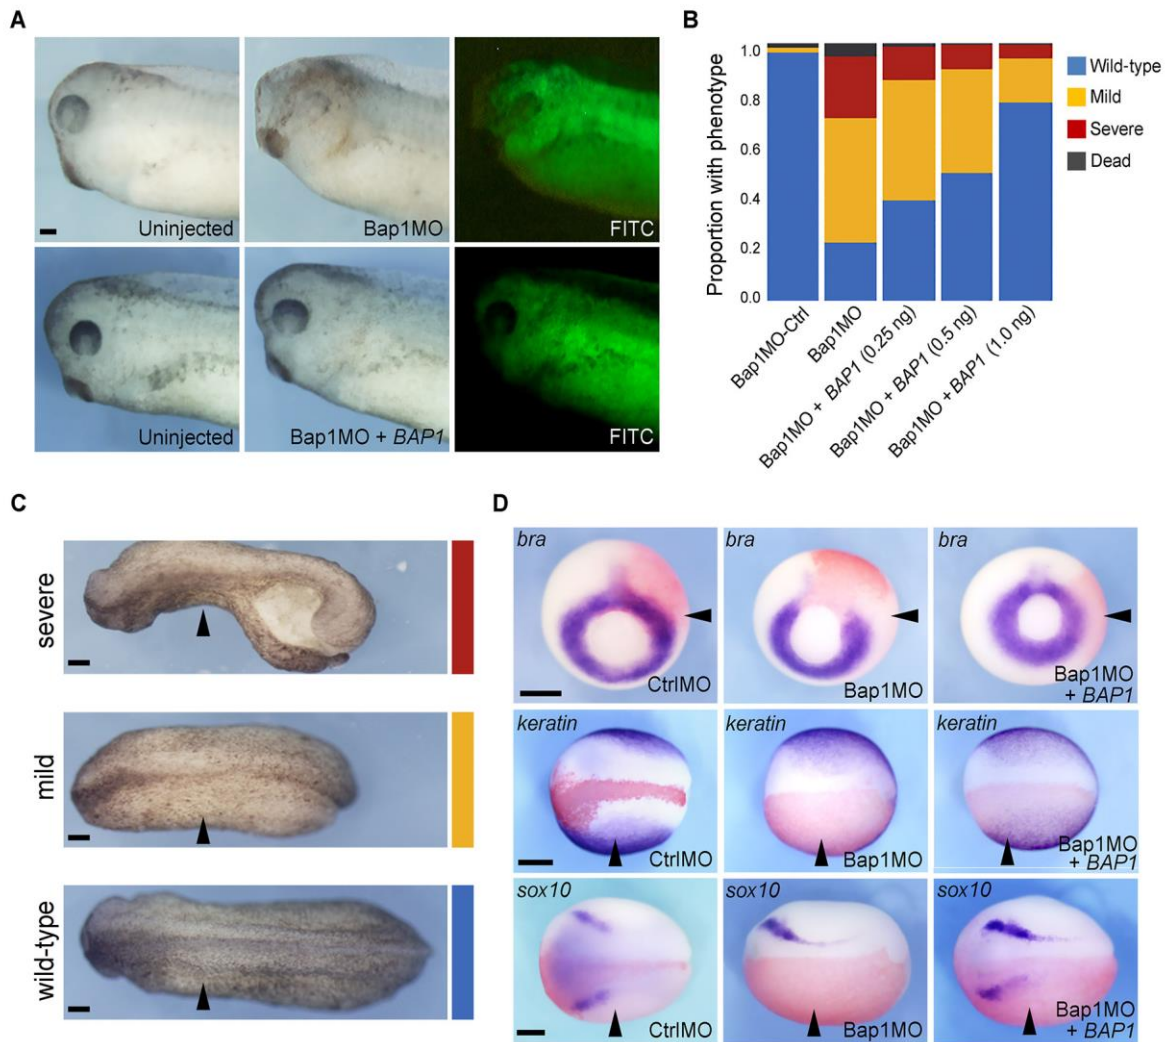

**Fig. S4. Developmental abnormalities in Bap1-deficient embryos are rescued by exogenous human BAP1.** (A) Representative embryos analyzed at late tailbud stage following injection into one blastomere at the two-cell stage of 7.5 ng Bap1MO or 7.5 ng Bap1MO plus 1 ng human *BAP1* mRNA, which is not recognized by Bap1MO. Fluorescein isothiocyanate (FITC) is a lineage tracer for the injected side (green). Microphthalmia eye defect is rescued by human BAP1 mRNA. Panels show lateral view, anterior left. (B) Human *BAP1* mRNA rescues the failure of embryo development, associated with Bap1 loss, in a dose-dependent manner. Embryos were injected with 7.5 ng Bap1MO plus human *BAP1* mRNA and analyzed at early tailbud stages (n=300 embryos from three different females, >90% with phenotype) (C) Visual representation of embryos summarized in B, showing the human *BAP1* mRNA rescue effect ranging from indistinguishable from wild-type (blue), to mild mesodermal foreshortening (yellow) to severe spina bifida (red). Panels show dorsal view, anterior left. (D) Representative embryos at gastrula and neurula stages treated as above and analyzed by whole mount *in situ* hybridization, demonstrating that failed expression of the indicated developmental genes in Bap1-deficient embryos was rescued by human *BAP1* mRNA. Panels show posterior view, dorsal side up (top row), and dorsal view, anterior left (middle and bottom rows). Scale bar: 250  $\mu$ m.

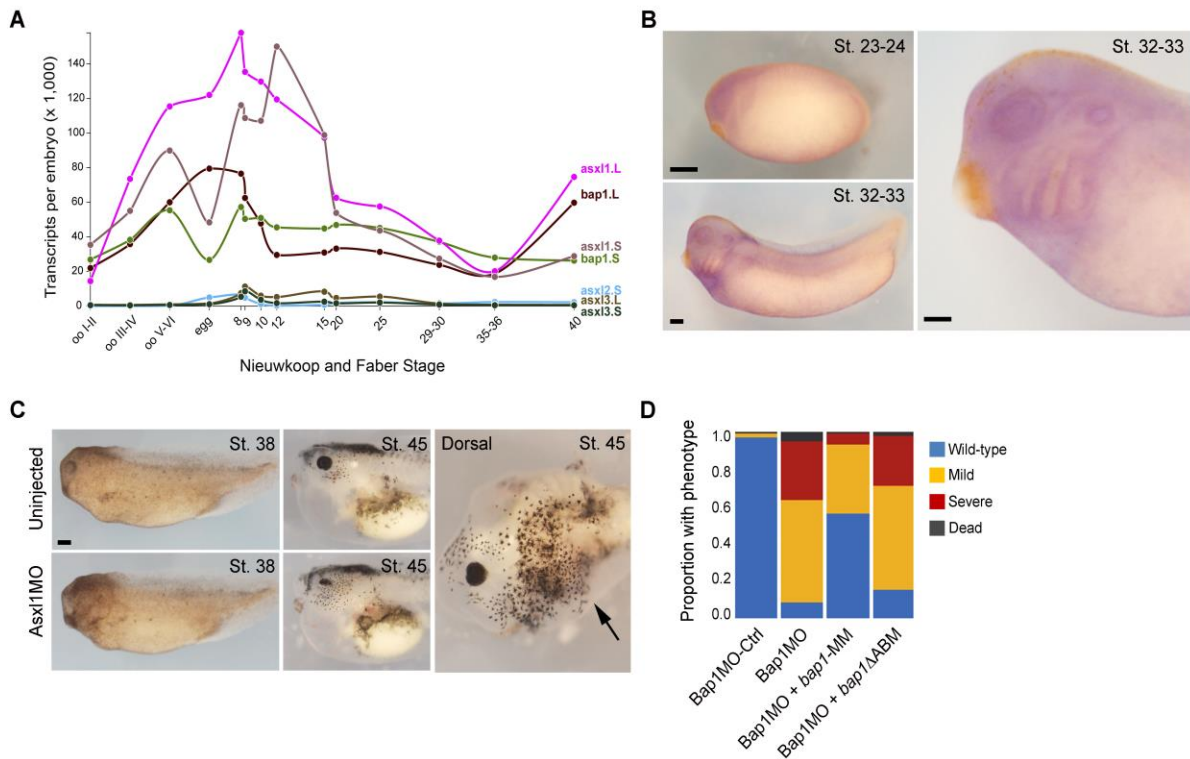

**Fig. S5. Loss of Asxl1 phenocopy loss of Bap1 during *Xenopus* development.** (A) RNA-seq global expression profiling of *bap1*, *asxl1*, *asxl2* and *asxl3* during *Xenopus* development (Xenbase.org), showing strongest correlation between *bap1* and *asxl1* expression. L and S indicate transcripts from long and short chromosomes, respectively. (B) Anatomic distribution of *asxl1* mRNA expression at the indicated stages of *Xenopus laevis* development analyzed by whole mount *in situ* hybridization, showing strong similarity to *bap1* expression pattern. Panels show lateral view, anterior left. (C) Representative embryos analyzed at the indicated stages following injection into one blastomere at the two-cell stage of 10 ng of Asxl1MO. Asxl1-deficiency phenocopied axial foreshortening, microphthalmia and abnormal melanocyte phenotype observed with Bap1-deficiency (see Fig. 1). Panels show lateral view, anterior left, except right panel showing dorsal view, anterior side down (arrow indicates injected side). (D) Summary of rescue experiments using either morpholino-resistant *Xenopus bap1* (*bap1*-MM) or *bap1* containing a mutation at the Asxl binding motif (*bap1*ΔABM) to rescue the Bap1-deficient phenotype caused by Bap1MO (n=300 embryos from three different females, >85% with phenotype, analyzed at late tailbud stages). In contrast to *bap1*-MM, co-injection with *bap1*ΔABM provided no rescue, indicating that Bap1 requires interaction with Asxls for its developmental functions. Scale bar: 250 μm.

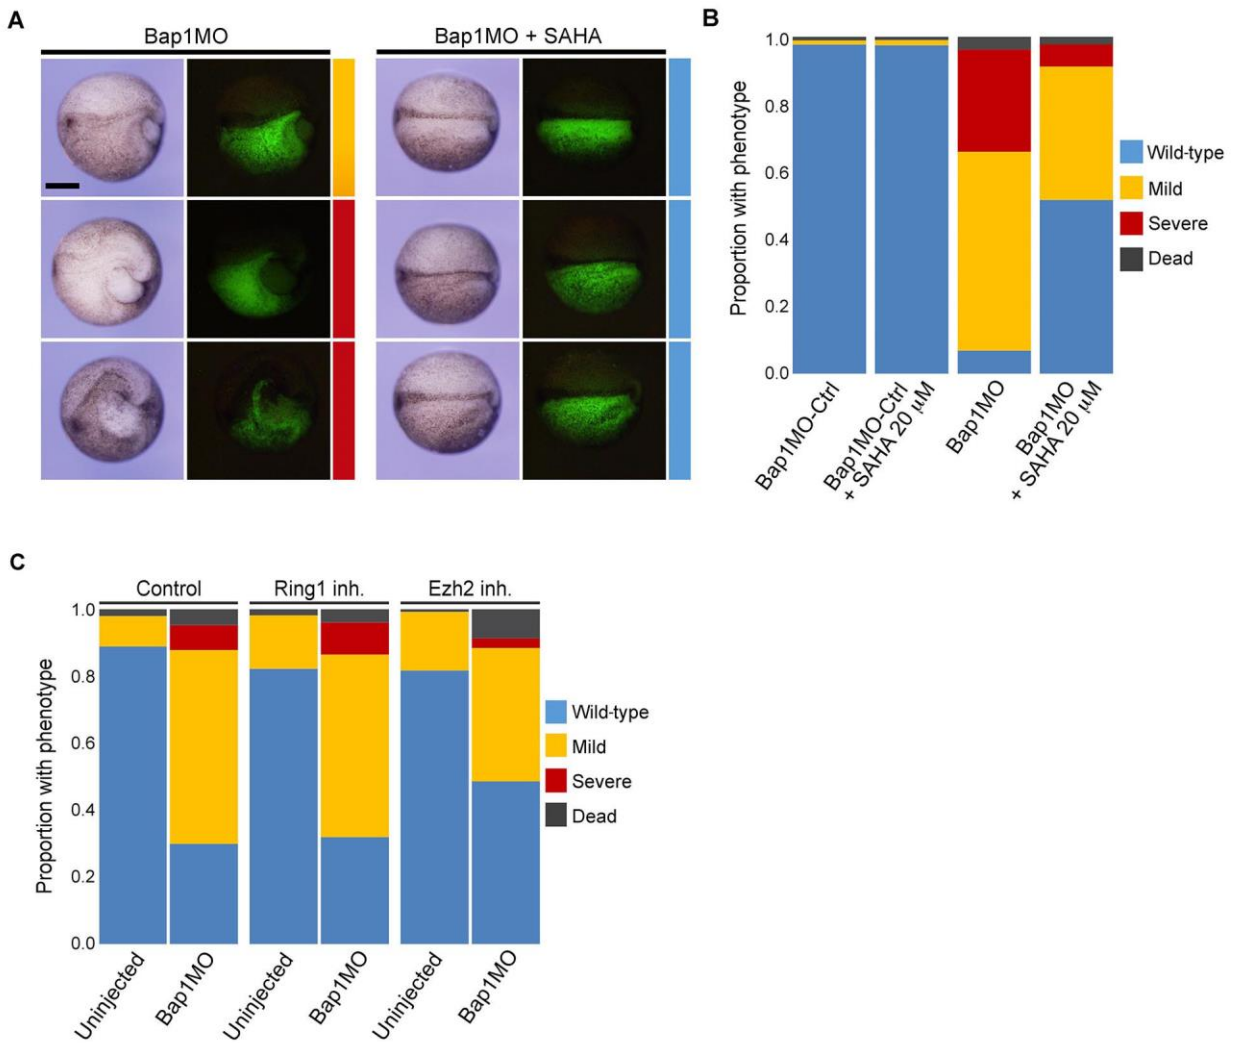

**Fig. S6. Pharmacologic rescue of Bap1-deficient phenotype.** (A) Treatment of embryos with pan-histone deacetylase inhibitor SAHA at mid-neurula (stage 14-16) following injection into one blastomere at two-cell embryo stages with 7.5 ng Bap1MO and incubated from blastula to neurula stages (stage 9 to 15) with DMSO alone (left 2 columns) or with 20  $\mu$ M SAHA in DMSO (right 2 columns). Fluorescence images are shown to the right of each corresponding color image to demonstrate FITC as a tracer for the injected side (green). (B) Summary of experiments (n=300 embryos from three different females, >90% with phenotype), showing substantial rescue of Bap1-deficient phenotype with SAHA treatment and lack of toxicity in control Bap1MO-Ctrl injected embryos. (C) Summary of results (n=835 embryos from three different females, >90% with phenotype) using the Ring1 inhibitor (PRC1 complex) PRP4165 and the Ezh2 inhibitor (PRC2 complex) GSK126, neither of which demonstrated rescue of the Bap1-deficient phenotype. Embryos were analyzed at mid-neurula (stage 14-16) following injection into one blastomere of two-cell embryos with 7.5 ng Bap1MO and incubated either with 20  $\mu$ M PRT4164 or 25  $\mu$ M GSK126 from blastula to early neurula stages (stage 9 to 13). Scale bar: 250  $\mu$ m.

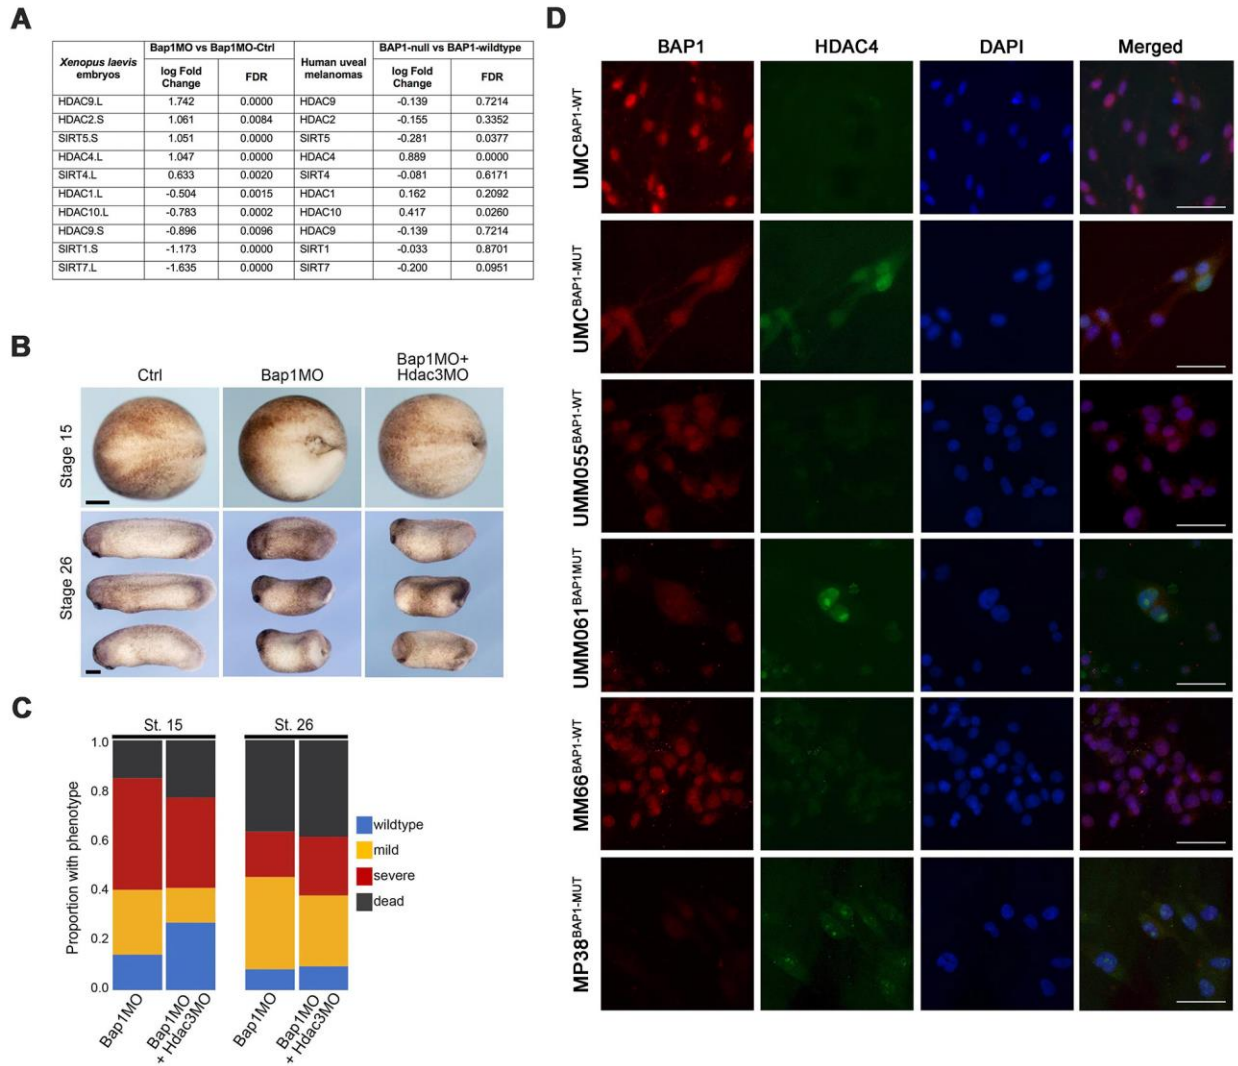

**Fig. S7. Hdac4 is a key mediator of Bap1-deficient phenotype and acts independently of Hdac3 during development.** (A) Comparison of RNA-seq data from *Xenopus laevis* embryos and 80 human uveal melanoma samples from TCGA to identify histone deacetylases that are differentially expressed in association with BAP1 loss. (B) Representative embryos injected at the 1-cell stage with 15 ng of Bap1MO with or without 8 ng of a morpholino directed against Hdac3 (Hdac3MO), analyzed at mid-neurula stage (stage 15, dorsal view, anterior to left) and early tailbud stage (stage 26, lateral view, anterior to left). Scale bar: 250  $\mu$ m. (C) Quantification of results depicted in B, showing no rescue of the Bap1-deficient phenotype by Hdac3MO (n=200 embryos from 2 females, >90% with phenotype). (D) Immunofluorescence imaging using antibodies against HDAC4 and BAP1 on normal human uveal melanocytes (UMC) that are wild-type for BAP1 (WT) or engineered to express a truncated inactive BAP1 protein using CRISPR/Cas9 (MUT). Primary uveal melanoma cells with wild-type BAP1 (UMM055 and MM66) or mutationally inactivated for BAP1 (UMM061 and MP38) were also examined. Scale bar: 50  $\mu$ m.



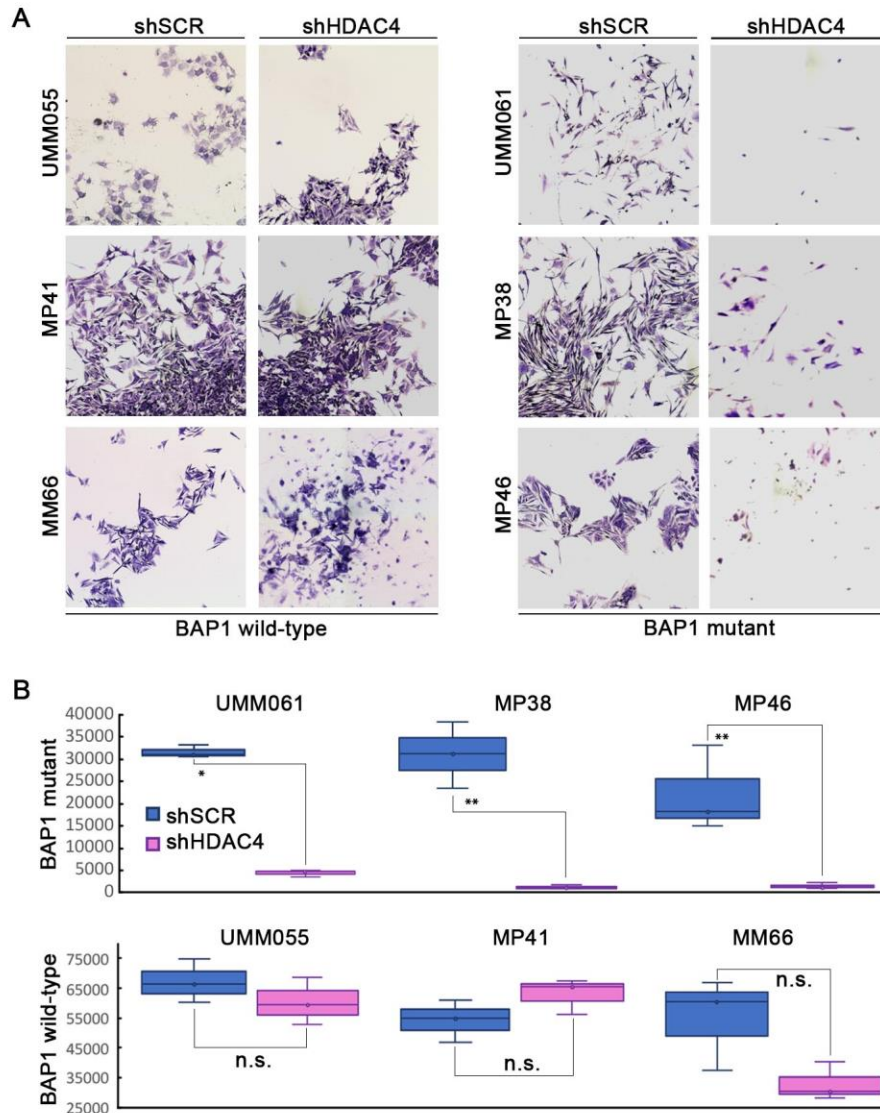

**Fig. S8. Inhibition of HDAC4 significantly impairs proliferation of uveal melanoma cells in a BAP1-dependent manner.** (A) Uveal melanoma cell lines with wild-type BAP1 (UMM055, MP41, and MM66) or with mutant BAP1 (UMM061, MP38, and MP46) were engineered to express shHDAC4 or control scrambled shSCR and plated at equal numbers ( $2 \times 10^3$ /well) and cultured for 2 weeks, after which they were stained with crystal violet and imaged under 20X magnification. BAP1-wildtype cells and control BAP1-mutant cells demonstrated typical morphology and growth, whereas BAP1-mutant cells expressing shHDAC4 demonstrated senescence phenotype and increased cell death. (B) To quantitate these findings, viable cells were counted using ImageJ. Each experiment was performed in triplicate. *P* values were determined by two-tailed t-test. \* $P < 0.001$ , \*\* $P < 0.05$ ; n.s., not significant.

## Supplemental Data Legends

**Data file S1. Oligonucleotides and plasmids used in this study.**

**Data file S2. Proteomic, transcriptomic, and epigenomic analyses.** (A) Mass spectrometry of Bap1 interacting proteins in *Xenopus laevis* stage 12 embryos. (B) RNA-seq data from *Xenopus laevis* stage 12 embryos analyzed for differentially expressed genes in wild-type and Bap1-knockdown embryos. (C) Quantification of ChIP-seq signals for H3K27ac, H3K27me3, H3K4me3 and H2AK119ub around transcription start sites  $\pm$  2 kb. (D) Subset of genes with decrease in H3K27ac signal >40% and corresponding decrease in RNA-seq gene expression  $\log_{2}FC < -0.6$  in Bap1-knockdown stage 12 embryos compared to embryos injected with CtrlMO.
